# Supplementary material for: Microscale organization and separability of upper extremity representations in the human motor homunculus
Source: Research Square preprint supplement (doi:10.21203/rs.3.rs-9528027/v1), 2026-04-29
Supplement: Supplementary file 2 [file 411074d5b78bfcd00e88bcff.docx]

**Extended Data Table 1.** Individual participant characteristics, as well as those for the therapeutic intervention and the recordings utilized to derive their data.

| Subject ID | Age | Condition | DBS Side | DBS Target | Behavior Recording Side | Number of Recs | N Categories | Investigated Single Joints |
| --- | --- | --- | --- | --- | --- | --- | --- | --- |
| 1 | 68 | PD | Bilateral | GPI | Right | - | N/A | N/A |
| 2 | 71 | PD | Bilateral | STN | Right | 2 | N/A | N/A |
| 3 | 74 | ET | Bilateral | VIM | Right | 3 | N/A | N/A |
| 4 | 70 | PD | Bilateral | STN | Right | 2 | 6 | Hand open/close, arm flexion/extension, shoulder abduction/adduction |
| 5 | 70 | PD | Bilateral | STN | Right | 3 | 6 | Hand open/close, arm flexion/extension, shoulder abduction/adduction |
| 6 | 67 | PD | Bilateral | STN | Right | 3 | 6 | Hand open/close, arm flexion/extension, shoulder abduction/adduction |
| 7 | 70 | ET | Bilateral | GPI | Left | 4 | 4 | Hand open/close, arm flexion/extension, shoulder abduction/adduction |
| 9 | 56 | PD | Bilateral | STN | Right | 5 | 4 | Individual fingers flexion/extension, wrist flexion/extension, forearm pronation/supination, arm flexion/extension, shoulder abduction/adduction |
| 10 | 63 | PD | Bilateral | STN | Right | 4 | 4 | Individual fingers flexion/extension, wrist flexion/extension, forearm pronation/supination, arm flexion/extension, shoulder abduction/adduction |
| 11 | 72 | PD | Bilateral | STN | Right | 5 | 4 | Individual fingers flexion/extension, wrist flexion/extension, forearm pronation/supination, arm flexion/extension, shoulder abduction/adduction |
| 12 | 61 | PD | Bilateral | STN | Right | 4 | 4 | Individual fingers flexion/extension, wrist flexion/extension, forearm pronation/supination, arm flexion/extension, shoulder abduction/adduction |
